# Supplementary material for: Decay Rates of Plasmonic Elliptical Nanostructures via Effective Medium Theory
Source: MDPI journal article supplement (doi:10.3390/nano11081928), 2021-07-27
Supplement: s1 [file s1]

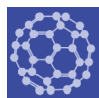

# Supplementary Materials: Decay Rates of Plasmonic Elliptical Nanostructures via Effective Medium Theory

M. Gamal <sup>1</sup>, I. Kandas <sup>1,2</sup>, H. Badran <sup>3</sup>, A. Hajjiah <sup>3</sup>, M. Muhammed <sup>4</sup>, and N. Shehata <sup>1,2,4,5,6,\*</sup>

## Section S1. Proof of $I_e$ integral for both ellipsoid and spheroid

For the ellipsoid:

$$I_e = \int_{\xi}^{\infty} \frac{du}{(c^2 + u)\sqrt{(a^2 + u)(b^2 + u)(c^2 + u)}}$$

Note that: for the ellipsoid  $a = b$

$$\therefore I_e = \int_{\xi}^{\infty} \frac{du}{(c^2 + u)\sqrt{(a^2 + u)^2(c^2 + u)}} = \int_{\xi}^{\infty} \frac{du}{(u + c^2)^{\frac{3}{2}}|u + a^2|}$$

Because of a and b always are  $\pm \sqrt{a^2}$ .

$$\therefore I_e = \int_{\xi}^{\infty} \frac{du}{(c^2 + u)\sqrt{(a^2 + u)^2(c^2 + u)}} = \int_{\xi}^{\infty} \frac{du}{(u + c^2)^{\frac{3}{2}}(u + a^2)}$$

$$\text{Let: } v = \sqrt{u + c^2} \rightarrow dv = \frac{1}{2\sqrt{u + c^2}} du \rightarrow du = 2\sqrt{u + c^2} dv$$

$$u = v^2 - c^2 \quad \text{at } u = \xi \rightarrow v = \sqrt{\xi^2 + c^2}$$

$$\text{at } u = \infty \rightarrow v = \infty$$

$$\therefore I_e = \int_{\sqrt{\xi^2 + c^2}}^{\infty} \frac{2\sqrt{u + c^2} dv}{(v^2 - c^2 + c^2)\sqrt{u + c^2}(v^2 - c^2 + a^2)} = \int_{\sqrt{\xi^2 + c^2}}^{\infty} \frac{2 dv}{v^2(v^2 - c^2 + a^2)}$$

By partial fraction, we get:

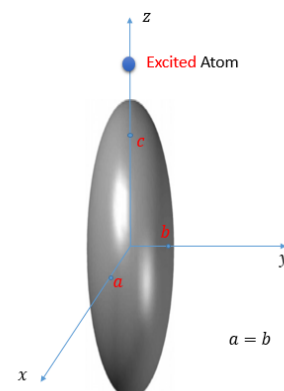

**Figure S1.** Atom located on z-axis at point z and having dipole momentum oriented along z-axis.

$$\begin{aligned} \therefore I_c &= 2 \int_{\sqrt{\xi+c^2}}^{\infty} \left( \frac{1}{(c^2-a^2)(v^2-c^2+a^2)} - \frac{1}{(c^2-a^2)v^2} \right) dv \\ &= \frac{2}{(c^2-a^2)} \int_{\sqrt{\xi+c^2}}^{\infty} \left( \frac{1}{(v^2-c^2+a^2)} - \frac{1}{v^2} \right) dv \end{aligned}$$

By solving the 1st integral:

$$\int_{\sqrt{\xi+c^2}}^{\infty} \frac{1}{(v^2-c^2+a^2)} dv = \int_{\sqrt{\xi+c^2}}^{\infty} \frac{1}{v^2-(c^2-a^2)} dv$$

$$\text{Let: } \omega = \frac{v}{\sqrt{c^2-a^2}} \rightarrow d\omega = \frac{dv}{\sqrt{c^2-a^2}} \rightarrow dv = \sqrt{c^2-a^2} d\omega$$

$$v = \omega \sqrt{c^2-a^2} \quad \text{at} \quad v = \sqrt{\xi+c^2} \rightarrow \omega = \sqrt{\frac{\xi+c^2}{c^2-a^2}}$$

$$\text{at} \quad v = \infty \rightarrow \omega = \infty$$

$$\therefore \int_{\sqrt{\xi+c^2}}^{\infty} \frac{1}{(v^2-c^2+a^2)} dv = \int_{\sqrt{\frac{\xi+c^2}{c^2-a^2}}}^{\infty} \frac{\sqrt{c^2-a^2}}{\omega^2(c^2-a^2)-(c^2-a^2)} d\omega = \frac{1}{\sqrt{c^2-a^2}} \int_{\sqrt{\frac{\xi+c^2}{c^2-a^2}}}^{\infty} \frac{1}{\omega^2-1} d\omega$$

By using partial fraction, we get:

$$\begin{aligned} \therefore \int_{\sqrt{\xi+c^2}}^{\infty} \frac{1}{(v^2-c^2+a^2)} dv &= \int_{\sqrt{\frac{\xi+c^2}{c^2-a^2}}}^{\infty} \frac{1}{2\sqrt{c^2-a^2}} \left( \frac{1}{\omega-1} - \frac{1}{\omega+1} \right) d\omega \\ &= \frac{1}{2\sqrt{c^2-a^2}} \left( \ln(\omega+1) \Big|_{\sqrt{\frac{\xi+c^2}{c^2-a^2}}}^{\infty} - \ln(\omega-1) \Big|_{\sqrt{\frac{\xi+c^2}{c^2-a^2}}}^{\infty} \right) \end{aligned}$$

$$= \frac{1}{2} \frac{1}{\sqrt{c^2 - a^2}} \left( \ln(\infty) - \ln \left( \sqrt{\frac{\xi + c^2}{c^2 - a^2}} - 1 \right) - \ln(\infty) + \ln \left( \sqrt{\frac{\xi + c^2}{c^2 - a^2}} + 1 \right) \right)$$

$$= \frac{1}{2} \frac{1}{\sqrt{c^2 - a^2}} \ln \left( \frac{\sqrt{\frac{\xi + c^2}{c^2 - a^2}} + 1}{\sqrt{\frac{\xi + c^2}{c^2 - a^2}} - 1} \right)$$

- By solving the 2nd integral:

$$\int_{\sqrt{\xi + c^2}}^{\infty} \frac{1}{v^2} dv = - \frac{1}{v} \Big|_{\sqrt{\xi + c^2}}^{\infty} = - \frac{1}{\infty} + \frac{1}{\sqrt{\xi + c^2}} = \frac{1}{\sqrt{\xi + c^2}}$$

∴ For ellipsoid

$$I_c(\xi) = \frac{1}{(c^2 - a^2)} \left[ \frac{1}{\sqrt{c^2 - a^2}} \ln \left( \frac{\sqrt{\frac{\xi + c^2}{c^2 - a^2}} + 1}{\sqrt{\frac{\xi + c^2}{c^2 - a^2}} - 1} \right) - \frac{2}{\sqrt{\xi + c^2}} \right], \quad c > (a, b)$$

### 1. For the spheroid:

$$I_c = \int_{\xi}^{\infty} \frac{du}{(c^2 + u) \sqrt{(a^2 + u)(b^2 + u)(c^2 + u)}}$$

**Note that:** for the spheroid  $a = b$

$$\therefore I_c = \int_{\xi}^{\infty} \frac{du}{(c^2 + u) \sqrt{(a^2 + u)^2 (c^2 + u)}} = \int_{\xi}^{\infty} \frac{du}{(u + c^2)^{\frac{3}{2}} |u + a^2|}$$

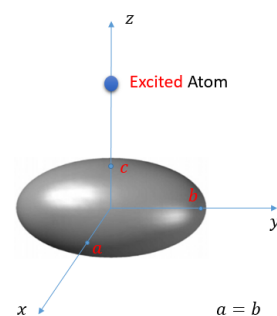

**Figure S2.** Atom located on z-axis at point z and having dipole momentum oriented along z-axis.

Because of  $a$  and  $b$  always are  $\neq 0$ .

$$\therefore I_c = \int_{\xi}^{\infty} \frac{du}{(c^2 + u)\sqrt{(a^2 + u)^2(c^2 + u)}} = \int_{\xi}^{\infty} \frac{du}{(u + c^2)^{\frac{3}{2}}(u + a^2)}$$

$$\text{Let: } v = \sqrt{u + c^2} \rightarrow dv = \frac{1}{2\sqrt{u + c^2}} du \rightarrow du = 2\sqrt{u + c^2} dv$$

$$u = v^2 - c^2 \quad \text{at } u = \xi \rightarrow v = \sqrt{\xi + c^2}$$

$$\text{at } u = \infty \rightarrow v = \infty$$

$$\therefore I_c = \int_{\sqrt{\xi + c^2}}^{\infty} \frac{2\sqrt{u + c^2} dv}{(v^2 - c^2 + c^2)\sqrt{u + c^2}(v^2 - c^2 + a^2)} = \int_{\sqrt{\xi + c^2}}^{\infty} \frac{2 dv}{v^2(v^2 - c^2 + a^2)}$$

By partial fraction, we get:

$$\begin{aligned} \therefore I_c &= 2 \int_{\sqrt{\xi + c^2}}^{\infty} \left( \frac{1}{(c^2 - a^2)(v^2 - c^2 + a^2)} - \frac{1}{(c^2 - a^2)v^2} \right) dv \\ &= \frac{2}{(c^2 - a^2)} \int_{\sqrt{\xi + c^2}}^{\infty} \left( \frac{1}{(v^2 - c^2 + a^2)} - \frac{1}{v^2} \right) dv \end{aligned}$$

- By solving the 1st integral:

$$\int_{\sqrt{\xi + c^2}}^{\infty} \frac{1}{(v^2 - c^2 + a^2)} dv = \int_{\sqrt{\xi + c^2}}^{\infty} \frac{1}{v^2 + (a^2 - c^2)} dv$$

$$\text{Let: } w = \frac{v}{\sqrt{a^2 - c^2}} \rightarrow dw = \frac{dv}{\sqrt{a^2 - c^2}} \rightarrow dv = \sqrt{a^2 - c^2} dw$$

$$v = \omega \sqrt{a^2 - c^2} \quad \text{at} \quad v = \sqrt{\xi + c^2} \rightarrow \omega = \sqrt{\frac{\xi + c^2}{a^2 - c^2}}$$

$$\text{at} \quad v = \infty \quad \rightarrow \quad \omega = \infty$$

$$\int_{\sqrt{\frac{\xi + c^2}{a^2 - c^2}}}^{\infty} \frac{\sqrt{a^2 - c^2}}{(a^2 - c^2)^2 \omega^2 + (a^2 - c^2)} d\omega = \frac{1}{\sqrt{a^2 - c^2}} \int_{\sqrt{\frac{\xi + c^2}{a^2 - c^2}}}^{\infty} \frac{d\omega}{\omega^2 + 1}$$

$$= \frac{1}{\sqrt{a^2 - c^2}} \tan^{-1}(\omega) \Big|_{\sqrt{\frac{\xi + c^2}{a^2 - c^2}}}^{\infty} = \frac{1}{\sqrt{a^2 - c^2}} \left[ \tan^{-1}(\infty) - \tan^{-1} \left( \sqrt{\frac{\xi + c^2}{a^2 - c^2}} \right) \right]$$

$$= \frac{1}{\sqrt{a^2 - c^2}} \left[ \frac{\pi}{2} - \tan^{-1} \left( \sqrt{\frac{\xi + c^2}{a^2 - c^2}} \right) \right]$$

- By solving the 2nd integral:

$$\int_{\sqrt{\xi + c^2}}^{\infty} \frac{1}{v^2} dv = -\frac{1}{v} \Big|_{\sqrt{\xi + c^2}}^{\infty} = -\frac{1}{\infty} + \frac{1}{\sqrt{\xi + c^2}} = \frac{1}{\sqrt{\xi + c^2}}$$

$$\therefore I_c(\xi) = \frac{2}{(c^2 - a^2)} \left[ \frac{1}{\sqrt{a^2 - c^2}} \left( \frac{\pi}{2} - \tan^{-1} \sqrt{\frac{\xi + c^2}{a^2 - c^2}} \right) - \frac{1}{\sqrt{\xi + c^2}} \right], \quad c < (a, b) \quad \text{for spheroid}$$

Section S2. Radiative decay rate for the ellipsoid and the spheroid using  $I_c$  integral

$$\left( \frac{\gamma}{\gamma_0} \right)_z^{\text{rad}} = \left| 1 + \frac{1}{2} abc (1 - \epsilon_{zz}) \left( \frac{\epsilon - 1}{\epsilon - \epsilon_{zz}} \right) \times \left( \frac{2}{z \sqrt{(z^2 + a^2 - c^2)(z^2 + b^2 - c^2)}} - I_c(\xi) \right) \right|^2$$

To find the value of  $\xi$  if the exited atom is located at z-direction, apply the following equation:

$$\frac{x^2}{a^2 + \xi} + \frac{y^2}{b^2 + \xi} + \frac{z^2}{c^2 + \xi} = 1$$

$$\text{at } x = 0, y = 0$$

$$\therefore \frac{z^2}{c^2 + \xi} = 1 \rightarrow \xi = z^2 - c^2$$

Substitute in equation  $I_e(\xi)$  we get:

$$\therefore \left( \frac{r}{r_0} \right)_z^{\text{rad}} = \left| 1 + \frac{1}{2} abc (1 - \epsilon_{rz}) \left( \frac{z-1}{a - \epsilon_{rz}} \right) \times \left( \frac{2}{z \sqrt{(z^2 + a^2 - c^2)(z^2 + b^2 - c^2)}} - I_e(z^2 - c^2) \right) \right|^2$$

For ellipsoid:

$$\therefore I_e(z^2 - c^2) = \frac{1}{(c^2 - a^2)} \left[ \frac{1}{\sqrt{a^2 - c^2}} \ln \left( \frac{\sqrt{\frac{z^2}{c^2 - a^2} + 1}}{\sqrt{\frac{\xi + c^2}{c^2 - a^2} + 1}} \right) - \frac{2}{z} \right], \quad c > a \quad (\text{p.20})$$

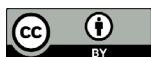

**Copyright:** © 2021 by the authors. Licensee MDPI, Basel, Switzerland. This article is an open access article distributed under the terms and conditions of the Creative Commons Attribution (CC BY) license (<http://creativecommons.org/licenses/by/4.0/>).

For spheroid:

$$\therefore I_e(z^2 - c^2) = \frac{2}{(c^2 - a^2)} \left[ \frac{1}{\sqrt{a^2 - c^2}} \left( \frac{\pi}{2} - \tan^{-1} \sqrt{\frac{z^2}{a^2 - c^2}} \right) - \frac{1}{z} \right], \quad c < a \quad (\text{p.21})$$

### Section S3. The general formula the effective medium theory

The general formula of the effective medium theory to calculate the elliptical permittivity and RI is

$$n_{eff}(z) = n_1 \frac{n_1 + [L_0 (1 - f(z)) + f(z)] (n_2 - n_1)}{n_1 + L_0 (1 - f(z)) (n_2 - n_1)}$$

However for the ellipsoid and the spheroid the factor of  $L_g$  is varies in different values, but we can do this approximation at  $L_g \rightarrow 0$  and  $L_g \rightarrow 1$ :

For ellipsoid: the  $L_g$  value approaches to 0 at large aspect ratio, so that the effective permittivity of the ellipsoid could be:

$$n_{eff}(z) = f(z) n_2 + (1 - f(z)) n_1$$

For spheroid: the  $L_g$  value approaches to 1 at the small aspect ratio, so that the effective permittivity of the spheroid could be:

$$(n_{eff}(z))^{-1} = f(z) n_2^{-1} + (1 - f(z)) n_1^{-1}$$

Whereas  $L_g$  and for the sphere  $L_g = 1/3$  this formula is reduced to this equation

$$n_{eff}(z) = n_1 \frac{3 n_1 + (1 + 2 f(z)) (n_2 - n_1)}{3 n_1 + (1 - f(z)) (n_2 - n_1)}$$

For example:

Let  $n_1 = 1.5$ ,  $n_2 = 3$  and  $f(z) = 0.5$  and by varing the value of  $L_g$  form 0 to 1. By applying the general equation of the effective medium theory that mentioned before, we get:

$$n_{eff}(z) = n_1 \frac{n_1 + [L_g (1 - f(z)) + f(z)] (n_2 - n_1)}{n_1 + L_g (1 - f(z)) (n_2 - n_1)} = 1.5 \frac{1.5 + [L_g (1 - 0.5) + 0.5] (3 - 1.5)}{1.5 + L_g (1 - 0.5) (3 - 1.5)}$$

$$n_{exact} = \frac{0.75 L_g + 2.25}{0.5 L_g + 1}$$

$$n_{approx} = 0.5 (3) + (1 - 0.5) 1.5 = 2.25.$$

the exact solution for large aspect ratio  $c/a = 5 \rightarrow L_g = 0.0558$  using the formula in the attached paper Equation (9),

the  $n_{exact} = 2.216$ , so that in order to calculate the error  $\Delta \%$  :

$$\Delta \varepsilon \% = \left| \frac{n_{\text{exact}} - n_{\text{approx}}}{n_{\text{exact}}} \right| * 100\%$$

$$= \left| \frac{2.216 - 2.25}{2.216} \right| * 100\% = 1.534 \%$$

Which means that the approximation could be acceptable in this range.
